# Supplementary material
Source: publisher site journal article supplement (http://static.cambridge.org/content/id/urn:cambridge.org:id:article:S0016756820000552/resource/name/S0016756820000552supp001.doc)
Supplement: Supplementary file 1 [file S0016756820000552supp001.doc]

**Geological Magazine**

**Newly identified Jurassic–Cretaceous migmatites in the Liaodong Peninsula: unravelling a Mesozoic anatectic event related to the lithospheric thinning of the North China Craton**

Jin Liu, Jian Zhang*, Changqing Yin, Changquan Cheng, Jiahui Qian, Chen Zhao, Ying Chen, Xiao Wang, Juiyen Hsia

**Supplementary Material**

Supplementary Table S1. U-Pb data of zircons from the migmatites in the southeastern Liaodong Peninsula

| Sample No. | Contents (ppm) | | Th/U | 207Pb/206Pb | | 207Pb/235U | | 206Pb/238U | | 207Pb/206Pb | | 207Pb/235U | | 206Pb/238U | |
| --- | --- | --- | --- | --- | --- | --- | --- | --- | --- | --- | --- | --- | --- | --- | --- |
|  | U | Th | ratio | 1σ | ratio | 1σ | ratio | 1σ | age (Ma) | 1σ | age (Ma) | 1σ | age (Ma) | 1σ |
| **LQ-N1:** **orthopyroxene-bearing biotite gneiss** | | | | | | | | | | | | | | | |
| LQ-N1-35 | 736.40 | 53.06 | 0.07 | 0.0491 | 0.0014 | 0.1819 | 0.0055 | 0.0268 | 0.0003 | 151 | 68 | 170 | 5 | 171 | 2 |
| LQ-N1-06 | 913.92 | 62.00 | 0.07 | 0.0499 | 0.0021 | 0.1864 | 0.0076 | 0.0270 | 0.0007 | 190 | 96 | 174 | 6 | 172 | 4 |
| LQ-N1-25 | 494.96 | 78.94 | 0.16 | 0.0503 | 0.0018 | 0.1872 | 0.0062 | 0.0272 | 0.0004 | 211 | 81 | 174 | 5 | 173 | 2 |
| LQ-N1-37 | 358.56 | 86.17 | 0.24 | 0.0494 | 0.0016 | 0.1859 | 0.0065 | 0.0273 | 0.0005 | 167 | 77 | 173 | 6 | 174 | 3 |
| LQ-N1-47 | 500.75 | 88.90 | 0.18 | 0.0496 | 0.0017 | 0.1851 | 0.0072 | 0.0273 | 0.0005 | 174 | 82 | 172 | 6 | 174 | 3 |
| LQ-N1-49 | 657.73 | 159.80 | 0.24 | 0.0497 | 0.0015 | 0.1865 | 0.0059 | 0.0274 | 0.0004 | 179 | 70 | 174 | 5 | 174 | 3 |
| LQ-N1-27 | 869.41 | 50.13 | 0.06 | 0.0497 | 0.0028 | 0.1872 | 0.0091 | 0.0274 | 0.0005 | 182 | 129 | 174 | 8 | 174 | 3 |
| LQ-N1-17 | 281.95 | 72.22 | 0.26 | 0.0505 | 0.0031 | 0.1885 | 0.0105 | 0.0276 | 0.0009 | 216 | 144 | 175 | 9 | 176 | 6 |
| LQ-N1-02 | 230.02 | 235.48 | 1.02 | 0.0489 | 0.0026 | 0.2343 | 0.0124 | 0.0348 | 0.0006 | 142 | 124 | 214 | 10 | 220 | 4 |
| LQ-N1-09 | 246.48 | 172.89 | 0.70 | 0.0506 | 0.0036 | 0.2398 | 0.0156 | 0.0348 | 0.0008 | 223 | 163 | 218 | 13 | 221 | 5 |
| LQ-N1-05 | 248.44 | 135.29 | 0.54 | 0.0506 | 0.0021 | 0.2417 | 0.0095 | 0.0349 | 0.0004 | 224 | 98 | 220 | 8 | 221 | 3 |
| LQ-N1-08 | 222.79 | 136.28 | 0.61 | 0.0507 | 0.0029 | 0.2441 | 0.0136 | 0.0351 | 0.0005 | 225 | 133 | 222 | 11 | 222 | 3 |
| LQ-N1-15 | 243.80 | 108.16 | 0.44 | 0.0514 | 0.0023 | 0.2462 | 0.0104 | 0.0351 | 0.0009 | 259 | 101 | 224 | 8 | 222 | 5 |
| LQ-N1-42 | 396.73 | 396.20 | 1.00 | 0.0513 | 0.0016 | 0.2490 | 0.0084 | 0.0352 | 0.0004 | 252 | 73 | 226 | 7 | 223 | 3 |
| LQ-N1-10 | 199.80 | 127.37 | 0.64 | 0.0504 | 0.0022 | 0.2453 | 0.0112 | 0.0352 | 0.0005 | 215 | 103 | 223 | 9 | 223 | 3 |
| LQ-N1-01 | 186.95 | 126.68 | 0.68 | 0.0524 | 0.0042 | 0.2471 | 0.0182 | 0.0352 | 0.0009 | 303 | 182 | 224 | 15 | 223 | 6 |
| LQ-N1-43 | 196.74 | 112.02 | 0.57 | 0.0514 | 0.0033 | 0.2467 | 0.0145 | 0.0352 | 0.0006 | 257 | 148 | 224 | 12 | 223 | 4 |
| LQ-N1-36 | 202.43 | 104.84 | 0.52 | 0.0503 | 0.0021 | 0.2453 | 0.0112 | 0.0352 | 0.0005 | 210 | 97 | 223 | 9 | 223 | 3 |
| LQ-N1-41 | 550.68 | 180.91 | 0.33 | 0.0510 | 0.0030 | 0.2471 | 0.0163 | 0.0352 | 0.0011 | 242 | 134 | 224 | 13 | 223 | 7 |
| LQ-N1-29 | 230.35 | 123.84 | 0.54 | 0.0507 | 0.0023 | 0.2447 | 0.0104 | 0.0352 | 0.0005 | 229 | 102 | 222 | 9 | 223 | 3 |
| LQ-N1-48 | 330.39 | 169.99 | 0.51 | 0.0510 | 0.0024 | 0.2477 | 0.0118 | 0.0353 | 0.0007 | 243 | 108 | 225 | 10 | 224 | 4 |
| LQ-N1-04 | 247.60 | 222.83 | 0.90 | 0.0505 | 0.0033 | 0.2456 | 0.0154 | 0.0354 | 0.0006 | 220 | 151 | 223 | 13 | 224 | 3 |
| LQ-N1-50 | 188.17 | 121.53 | 0.65 | 0.0509 | 0.0026 | 0.2465 | 0.0122 | 0.0354 | 0.0006 | 238 | 119 | 224 | 10 | 224 | 4 |
| LQ-N1-51 | 176.56 | 113.33 | 0.64 | 0.0518 | 0.0026 | 0.2505 | 0.0138 | 0.0354 | 0.0007 | 276 | 115 | 227 | 11 | 224 | 4 |
| LQ-N1-39 | 326.58 | 124.10 | 0.38 | 0.0515 | 0.0018 | 0.2515 | 0.0096 | 0.0354 | 0.0006 | 261 | 80 | 228 | 8 | 224 | 4 |
| LQ-N1-23 | 216.55 | 154.59 | 0.71 | 0.0512 | 0.0021 | 0.2496 | 0.0101 | 0.0354 | 0.0004 | 250 | 93 | 226 | 8 | 224 | 3 |
| LQ-N1-26 | 241.68 | 121.18 | 0.50 | 0.0511 | 0.0019 | 0.2482 | 0.0087 | 0.0354 | 0.0005 | 247 | 87 | 225 | 7 | 225 | 3 |
| LQ-N1-13 | 330.31 | 162.13 | 0.49 | 0.0507 | 0.0019 | 0.2466 | 0.0083 | 0.0355 | 0.0005 | 229 | 85 | 224 | 7 | 225 | 3 |
| LQ-N1-28 | 280.56 | 177.90 | 0.63 | 0.0506 | 0.0016 | 0.2469 | 0.0075 | 0.0355 | 0.0004 | 222 | 72 | 224 | 6 | 225 | 3 |
| LQ-N1-52 | 205.60 | 114.94 | 0.56 | 0.0503 | 0.0020 | 0.2443 | 0.0092 | 0.0355 | 0.0005 | 208 | 93 | 222 | 7 | 225 | 3 |
| LQ-N1-31 | 342.05 | 192.49 | 0.56 | 0.0513 | 0.0019 | 0.2488 | 0.0082 | 0.0355 | 0.0005 | 255 | 83 | 226 | 7 | 225 | 3 |
| LQ-N1-22 | 230.04 | 125.32 | 0.54 | 0.0514 | 0.0018 | 0.2506 | 0.0084 | 0.0355 | 0.0004 | 261 | 78 | 227 | 7 | 225 | 3 |
| LQ-N1-20 | 175.38 | 151.78 | 0.87 | 0.0509 | 0.0033 | 0.2478 | 0.0165 | 0.0356 | 0.0010 | 236 | 151 | 225 | 13 | 226 | 6 |
| LQ-N1-45 | 314.86 | 178.17 | 0.57 | 0.0506 | 0.0016 | 0.2483 | 0.0089 | 0.0356 | 0.0006 | 224 | 74 | 225 | 7 | 226 | 4 |
| LQ-N1-40 | 192.62 | 106.67 | 0.55 | 0.0514 | 0.0023 | 0.2477 | 0.0107 | 0.0356 | 0.0006 | 261 | 105 | 225 | 9 | 226 | 4 |
| LQ-N1-16 | 300.45 | 156.04 | 0.52 | 0.0512 | 0.0021 | 0.2493 | 0.0090 | 0.0357 | 0.0004 | 249 | 93 | 226 | 7 | 226 | 3 |
| LQ-N1-34 | 351.88 | 168.87 | 0.48 | 0.0514 | 0.0022 | 0.2513 | 0.0096 | 0.0357 | 0.0005 | 261 | 96 | 228 | 8 | 226 | 3 |
| LQ-N1-24 | 244.58 | 129.34 | 0.53 | 0.0508 | 0.0023 | 0.2489 | 0.0105 | 0.0358 | 0.0006 | 230 | 104 | 226 | 8 | 227 | 4 |
| LQ-N1-33 | 252.75 | 114.56 | 0.45 | 0.0501 | 0.0017 | 0.2475 | 0.0080 | 0.0359 | 0.0005 | 200 | 79 | 225 | 6 | 228 | 3 |
| LQ-N1-12 | 313.89 | 169.06 | 0.54 | 0.0499 | 0.0020 | 0.2474 | 0.0107 | 0.0359 | 0.0005 | 191 | 94 | 224 | 9 | 228 | 3 |
| LQ-N1-14 | 1006.09 | 677.27 | 0.67 | 0.0524 | 0.0022 | 0.2582 | 0.0096 | 0.0360 | 0.0007 | 303 | 94 | 233 | 8 | 228 | 4 |
| **SDZ-N1：Biotite-bearing gneiss** | | | | | | | | | | | | | | | |
| SDZ-N1-09 | 410.53 | 6.43 | 0.02 | 0.0502 | 0.0031 | 0.1331 | 0.0091 | 0.0192 | 0.0004 | 204 | 144 | 127 | 8 | 122 | 3 |
| SDZ-N1-10 | 361.84 | 5.28 | 0.01 | 0.0481 | 0.0025 | 0.1268 | 0.0064 | 0.0192 | 0.0003 | 103 | 122 | 121 | 6 | 123 | 2 |
| SDZ-N1-18 | 433.91 | 21.53 | 0.05 | 0.0491 | 0.0022 | 0.1324 | 0.0063 | 0.0195 | 0.0003 | 154 | 105 | 126 | 6 | 124 | 2 |
| SDZ-N1-23 | 315.07 | 3.15 | 0.01 | 0.0481 | 0.0029 | 0.1299 | 0.0076 | 0.0196 | 0.0004 | 102 | 141 | 124 | 7 | 125 | 2 |
| SDZ-N1-06 | 357.73 | 5.40 | 0.02 | 0.0498 | 0.0039 | 0.1346 | 0.0122 | 0.0197 | 0.0007 | 185 | 181 | 128 | 11 | 125 | 4 |
| SDZ-N1-01 | 109.23 | 0.53 | 0.00 | 0.0548 | 0.0060 | 0.1374 | 0.0129 | 0.0197 | 0.0007 | 406 | 246 | 131 | 12 | 126 | 4 |
| SDZ-N1-08 | 967.05 | 22.70 | 0.02 | 0.0485 | 0.0015 | 0.1327 | 0.0044 | 0.0198 | 0.0002 | 125 | 73 | 127 | 4 | 126 | 2 |
| SDZ-N1-02 | 400.29 | 214.45 | 0.54 | 0.1152 | 0.0024 | 3.2547 | 0.1009 | 0.2066 | 0.0054 | 1884 | 37 | 1470 | 24 | 1211 | 29 |
| SDZ-N1-22 | 831.93 | 22.65 | 0.03 | 0.1145 | 0.0013 | 3.7536 | 0.0876 | 0.2355 | 0.0034 | 1872 | 20 | 1583 | 19 | 1363 | 18 |
| SDZ-N1-14 | 372.57 | 48.59 | 0.13 | 0.1167 | 0.0020 | 4.1118 | 0.0818 | 0.2554 | 0.0037 | 1907 | 31 | 1657 | 16 | 1466 | 19 |
| SDZ-N1-28 | 352.21 | 22.99 | 0.07 | 0.1151 | 0.0021 | 4.2664 | 0.0961 | 0.2672 | 0.0033 | 1882 | 33 | 1687 | 19 | 1527 | 17 |
| SDZ-N1-12 | 1028.65 | 75.37 | 0.07 | 0.1177 | 0.0017 | 4.3595 | 0.0915 | 0.2682 | 0.0047 | 1921 | 25 | 1705 | 17 | 1532 | 24 |
| SDZ-N1-26 | 463.72 | 34.29 | 0.07 | 0.1149 | 0.0029 | 4.3206 | 0.0977 | 0.2720 | 0.0036 | 1878 | 45 | 1697 | 19 | 1551 | 18 |
| SDZ-N1-31 | 179.17 | 84.20 | 0.47 | 0.1145 | 0.0026 | 4.3552 | 0.1215 | 0.2746 | 0.0050 | 1873 | 41 | 1704 | 23 | 1564 | 25 |
| SDZ-N1-11 | 567.92 | 41.64 | 0.07 | 0.1147 | 0.0014 | 4.4072 | 0.0491 | 0.2783 | 0.0026 | 1875 | 21 | 1714 | 9 | 1583 | 13 |
| SDZ-N1-16 | 368.63 | 47.44 | 0.13 | 0.1166 | 0.0022 | 4.5356 | 0.0864 | 0.2825 | 0.0033 | 1904 | 34 | 1738 | 16 | 1604 | 16 |
| SDZ-N1-07 | 451.98 | 51.62 | 0.11 | 0.1161 | 0.0033 | 5.0432 | 0.1337 | 0.3143 | 0.0066 | 1897 | 52 | 1827 | 22 | 1762 | 32 |
| SDZ-N1-04 | 325.67 | 54.09 | 0.17 | 0.1141 | 0.0012 | 4.9877 | 0.0795 | 0.3161 | 0.0037 | 1866 | 20 | 1817 | 13 | 1771 | 18 |
| SDZ-N1-24 | 177.79 | 136.34 | 0.77 | 0.1147 | 0.0019 | 5.0979 | 0.1244 | 0.3201 | 0.0045 | 1876 | 30 | 1836 | 21 | 1790 | 22 |
| SDZ-N1-05 | 474.04 | 193.95 | 0.41 | 0.1135 | 0.0013 | 5.0173 | 0.0601 | 0.3207 | 0.0036 | 1857 | 21 | 1822 | 10 | 1793 | 17 |
| SDZ-N1-03 | 175.54 | 59.99 | 0.34 | 0.1284 | 0.0014 | 5.7280 | 0.0772 | 0.3227 | 0.0036 | 2077 | 19 | 1936 | 12 | 1803 | 18 |
| SDZ-N1-15 | 301.24 | 51.47 | 0.17 | 0.1149 | 0.0018 | 5.2011 | 0.1115 | 0.3262 | 0.0041 | 1878 | 28 | 1853 | 18 | 1820 | 20 |
| SDZ-N1-27 | 524.46 | 197.25 | 0.38 | 0.1136 | 0.0016 | 5.1409 | 0.1155 | 0.3269 | 0.0050 | 1857 | 26 | 1843 | 19 | 1823 | 24 |
| SDZ-N1-30 | 534.13 | 377.07 | 0.71 | 0.1559 | 0.0025 | 7.7108 | 0.1291 | 0.3568 | 0.0036 | 2411 | 28 | 2198 | 15 | 1967 | 17 |
| SDZ-N1-25 | 733.89 | 209.24 | 0.29 | 0.1632 | 0.0017 | 9.5022 | 0.1300 | 0.4199 | 0.0032 | 2489 | 17 | 2388 | 13 | 2260 | 14 |
| SDZ-N1-21 | 256.78 | 213.05 | 0.83 | 0.1626 | 0.0023 | 9.6137 | 0.2527 | 0.4234 | 0.0062 | 2483 | 24 | 2398 | 24 | 2276 | 28 |
| SDZ-N1-19 | 232.12 | 287.34 | 1.24 | 0.1679 | 0.0017 | 10.6043 | 0.1473 | 0.4559 | 0.0037 | 2537 | 17 | 2489 | 13 | 2421 | 17 |
| **YBG-N1：****sillimanite-bearing** **two-mica gneiss** | | | | | | | | | | | | | | | |
| YBG-N1-32 | 203.24 | 0.33 | 0.01 | 0.0490 | 0.0031 | 0.1294 | 0.0076 | 0.0195 | 0.0005 | 150 | 148 | 124 | 7 | 125 | 3 |
| YBG-BY-1 | 368.98 | 10.23 | 0.03 | 0.0491 | 0.0047 | 0.1291 | 0.0137 | 0.0189 | 0.0007 | 153 | 224 | 123 | 12 | 121 | 4 |
| YBG-BY-2 | 298.41 | 9.54 | 0.03 | 0.0467 | 0.0021 | 0.1236 | 0.0054 | 0.0193 | 0.0003 | 35 | 105 | 118 | 5 | 123 | 2 |
| YBG-BY-3 | 402.43 | 6.82 | 0.02 | 0.0503 | 0.0014 | 0.1339 | 0.0036 | 0.0194 | 0.0002 | 208 | 64 | 128 | 3 | 124 | 2 |
| YBG-BY-4 | 228.02 | 0.63 | 0.00 | 0.0519 | 0.0021 | 0.1381 | 0.0051 | 0.0196 | 0.0002 | 282 | 94 | 131 | 5 | 125 | 2 |
| YBG-BY-5 | 748.68 | 10.58 | 0.01 | 0.0484 | 0.0017 | 0.1316 | 0.0047 | 0.0198 | 0.0003 | 117 | 81 | 126 | 4 | 126 | 2 |
| YBG-BY-6 | 335.18 | 7.16 | 0.02 | 0.0472 | 0.0021 | 0.1281 | 0.0057 | 0.0199 | 0.0003 | 61 | 107 | 122 | 5 | 127 | 2 |
| YBG-1-20 | 201.62 | 3.18 | 0.02 | 0.0491 | 0.0037 | 0.1525 | 0.0133 | 0.0222 | 0.0007 | 155 | 176 | 144 | 12 | 142 | 4 |
| YBG-1-05 | 346.85 | 70.16 | 0.20 | 0.0508 | 0.0039 | 0.1533 | 0.0098 | 0.0225 | 0.0007 | 231 | 175 | 145 | 9 | 143 | 5 |
| YBG-1-15 | 136.61 | 2.78 | 0.02 | 0.0475 | 0.0065 | 0.1468 | 0.0186 | 0.0231 | 0.0009 | 76 | 324 | 139 | 16 | 148 | 6 |
| YBG-N1-26 | 315.74 | 434.32 | 1.38 | 0.0495 | 0.0016 | 0.1960 | 0.0065 | 0.0289 | 0.0004 | 173 | 78 | 182 | 6 | 184 | 2 |
| YBG-N1-27 | 220.13 | 125.46 | 0.57 | 0.0496 | 0.0020 | 0.1976 | 0.0081 | 0.0291 | 0.0004 | 178 | 96 | 183 | 7 | 185 | 2 |
| YBG-N1-07 | 88.33 | 75.55 | 0.86 | 0.0518 | 0.0036 | 0.2043 | 0.0138 | 0.0293 | 0.0006 | 275 | 161 | 189 | 12 | 186 | 4 |
| YBG-N1-21 | 305.33 | 273.41 | 0.90 | 0.0506 | 0.0019 | 0.2445 | 0.0093 | 0.0353 | 0.0007 | 224 | 86 | 222 | 8 | 224 | 4 |
| YBG-N1-16 | 747.01 | 295.95 | 0.40 | 0.0503 | 0.0012 | 0.2487 | 0.0069 | 0.0358 | 0.0006 | 211 | 55 | 226 | 6 | 227 | 4 |
| YBG-N1-28 | 332.89 | 223.80 | 0.67 | 0.0501 | 0.0021 | 0.2481 | 0.0116 | 0.0359 | 0.0006 | 197 | 98 | 225 | 9 | 227 | 4 |
| YBG-N1-31 | 395.46 | 35.88 | 0.09 | 0.1187 | 0.0031 | 3.7509 | 0.1386 | 0.2271 | 0.0059 | 1937 | 46 | 1582 | 30 | 1319 | 31 |
| YBG-N1-22 | 791.66 | 87.93 | 0.11 | 0.1154 | 0.0008 | 4.1484 | 0.0607 | 0.2603 | 0.0034 | 1885 | 13 | 1664 | 12 | 1491 | 18 |
| YBG-N1-29 | 266.00 | 77.55 | 0.29 | 0.1150 | 0.0017 | 4.2698 | 0.0695 | 0.2693 | 0.0033 | 1880 | 26 | 1688 | 13 | 1537 | 17 |
| YBG-N1-13 | 282.52 | 37.86 | 0.13 | 0.1150 | 0.0017 | 4.3681 | 0.0862 | 0.2752 | 0.0040 | 1879 | 27 | 1706 | 16 | 1567 | 20 |
| YBG-N1-33 | 926.95 | 210.40 | 0.23 | 0.1135 | 0.0012 | 4.4446 | 0.0571 | 0.2831 | 0.0025 | 1856 | 19 | 1721 | 11 | 1607 | 12 |
| YBG-N1-35 | 323.98 | 67.25 | 0.21 | 0.1132 | 0.0017 | 4.5593 | 0.0651 | 0.2909 | 0.0034 | 1851 | 27 | 1742 | 12 | 1646 | 17 |
| YBG-N1-24 | 361.26 | 35.53 | 0.10 | 0.1144 | 0.0011 | 4.6294 | 0.0891 | 0.2933 | 0.0043 | 1871 | 18 | 1755 | 16 | 1658 | 21 |
| YBG-N1-10 | 231.20 | 31.35 | 0.14 | 0.1138 | 0.0012 | 4.6265 | 0.0593 | 0.2946 | 0.0039 | 1861 | 20 | 1754 | 11 | 1664 | 19 |
| YBG-N1-06 | 162.42 | 104.43 | 0.64 | 0.1134 | 0.0018 | 4.7030 | 0.0723 | 0.3005 | 0.0042 | 1855 | 28 | 1768 | 13 | 1694 | 21 |
| YBG-N1-25 | 598.30 | 323.80 | 0.54 | 0.1119 | 0.0010 | 4.8055 | 0.0551 | 0.3104 | 0.0036 | 1830 | 16 | 1786 | 10 | 1743 | 18 |
| YBG-N1-17 | 300.43 | 196.91 | 0.66 | 0.1130 | 0.0012 | 4.8487 | 0.0937 | 0.3108 | 0.0052 | 1849 | 19 | 1793 | 16 | 1745 | 26 |
| YBG-N1-18 | 487.98 | 82.23 | 0.17 | 0.1125 | 0.0011 | 4.8213 | 0.0777 | 0.3108 | 0.0043 | 1840 | 17 | 1789 | 14 | 1745 | 21 |
| YBG-N1-23 | 184.38 | 115.70 | 0.63 | 0.1141 | 0.0021 | 4.8882 | 0.0945 | 0.3111 | 0.0046 | 1865 | 33 | 1800 | 16 | 1746 | 23 |
| YBG-N1-14 | 195.80 | 42.09 | 0.21 | 0.1127 | 0.0024 | 4.8795 | 0.1008 | 0.3145 | 0.0049 | 1843 | 39 | 1799 | 17 | 1763 | 24 |
| YBG-N1-11 | 792.94 | 89.26 | 0.11 | 0.1122 | 0.0020 | 4.8849 | 0.0869 | 0.3154 | 0.0037 | 1836 | 31 | 1800 | 15 | 1767 | 18 |
| YBG-N1-03 | 314.14 | 40.36 | 0.13 | 0.1128 | 0.0013 | 4.9514 | 0.0611 | 0.3176 | 0.0034 | 1845 | 20 | 1811 | 10 | 1778 | 17 |
| YBG-N1-30 | 582.08 | 25.99 | 0.04 | 0.1160 | 0.0021 | 5.2934 | 0.0788 | 0.3285 | 0.0038 | 1895 | 32 | 1868 | 13 | 1831 | 19 |
| YBG-N1-08 | 169.25 | 43.67 | 0.26 | 0.1224 | 0.0027 | 5.9226 | 0.1386 | 0.3494 | 0.0061 | 1992 | 39 | 1965 | 20 | 1932 | 29 |
| YBG-N1-12 | 362.20 | 199.85 | 0.55 | 0.1282 | 0.0025 | 6.4765 | 0.1747 | 0.3639 | 0.0066 | 2074 | 35 | 2043 | 24 | 2001 | 31 |
| YBG-N1-04 | 421.27 | 236.06 | 0.56 | 0.1438 | 0.0018 | 7.5756 | 0.1407 | 0.3813 | 0.0039 | 2274 | 22 | 2182 | 17 | 2082 | 18 |
| YBG-N1-09 | 237.67 | 241.32 | 1.02 | 0.1551 | 0.0037 | 9.1624 | 0.2417 | 0.4294 | 0.0092 | 2403 | 41 | 2354 | 24 | 2303 | 41 |
| YBG-N1-01 | 106.74 | 56.51 | 0.53 | 0.1531 | 0.0030 | 9.1718 | 0.2173 | 0.4336 | 0.0060 | 2380 | 33 | 2355 | 22 | 2322 | 27 |
| YBG-BY-7 | 211.44 | 42.51 | 0.20 | 0.1135 | 0.0016 | 4.2122 | 0.0863 | 0.2702 | 0.0043 | 1856 | 26 | 1676 | 17 | 1542 | 22 |
| YBG-BY-8 | 290.00 | 97.27 | 0.34 | 0.1134 | 0.0010 | 4.6064 | 0.0557 | 0.2937 | 0.0031 | 1855 | 16 | 1750 | 10 | 1660 | 16 |
| YBG-BY-9 | 414.25 | 123.60 | 0.30 | 0.1679 | 0.0016 | 9.7667 | 0.0762 | 0.4215 | 0.0048 | 2536 | 16 | 2413 | 7 | 2267 | 22 |
| **CJG-N1:** **titanite-bearing biotite gneiss** | | | | | | | | | | | | | | | |
| CJG-N1-06 | 60.44 | 46.22 | 0.76 | 0.0514 | 0.0045 | 0.1707 | 0.0148 | 0.0249 | 0.0006 | 258 | 203 | 160 | 13 | 159 | 4 |
| CJG-N1-25 | 200.45 | 58.28 | 0.29 | 0.0518 | 0.0031 | 0.1747 | 0.0091 | 0.0250 | 0.0005 | 278 | 139 | 163 | 8 | 159 | 3 |
| CJG-N1-02 | 61.47 | 47.30 | 0.77 | 0.0512 | 0.0042 | 0.1724 | 0.0133 | 0.0252 | 0.0005 | 248 | 189 | 162 | 12 | 160 | 3 |
| CJG-N1-36 | 128.72 | 13.68 | 0.11 | 0.0496 | 0.0038 | 0.1720 | 0.0125 | 0.0253 | 0.0006 | 177 | 181 | 161 | 11 | 161 | 4 |
| CJG-N1-45 | 155.12 | 70.96 | 0.46 | 0.0510 | 0.0029 | 0.1741 | 0.0092 | 0.0253 | 0.0004 | 241 | 129 | 163 | 8 | 161 | 3 |
| CJG-N1-30 | 65.50 | 42.86 | 0.65 | 0.0559 | 0.0079 | 0.1756 | 0.0202 | 0.0253 | 0.0010 | 449 | 313 | 164 | 17 | 161 | 6 |
| CJG-N1-15 | 219.25 | 47.19 | 0.22 | 0.0499 | 0.0040 | 0.1755 | 0.0142 | 0.0255 | 0.0006 | 191 | 185 | 164 | 12 | 162 | 4 |
| CJG-N1-26 | 582.23 | 95.35 | 0.16 | 0.0500 | 0.0025 | 0.1771 | 0.0084 | 0.0255 | 0.0004 | 195 | 117 | 166 | 7 | 162 | 3 |
| CJG-N1-48 | 182.70 | 212.31 | 1.16 | 0.0502 | 0.0028 | 0.2365 | 0.0132 | 0.0342 | 0.0006 | 202 | 129 | 216 | 11 | 217 | 4 |
| CJG-N1-38 | 207.69 | 163.51 | 0.79 | 0.0507 | 0.0023 | 0.2415 | 0.0108 | 0.0345 | 0.0004 | 228 | 104 | 220 | 9 | 219 | 3 |
| CJG-N1-01 | 140.86 | 108.29 | 0.77 | 0.0509 | 0.0028 | 0.2406 | 0.0133 | 0.0346 | 0.0005 | 238 | 129 | 219 | 11 | 219 | 3 |
| CJG-N1-29 | 116.84 | 81.61 | 0.70 | 0.0514 | 0.0042 | 0.2397 | 0.0180 | 0.0346 | 0.0007 | 257 | 188 | 218 | 15 | 219 | 4 |
| CJG-N1-37 | 194.27 | 126.80 | 0.65 | 0.0513 | 0.0022 | 0.2443 | 0.0098 | 0.0346 | 0.0005 | 253 | 97 | 222 | 8 | 219 | 3 |
| CJG-N1-33 | 192.90 | 173.37 | 0.90 | 0.0511 | 0.0025 | 0.2424 | 0.0113 | 0.0346 | 0.0006 | 244 | 113 | 220 | 9 | 220 | 4 |
| CJG-N1-39 | 153.87 | 165.39 | 1.07 | 0.0522 | 0.0033 | 0.2473 | 0.0148 | 0.0347 | 0.0007 | 295 | 144 | 224 | 12 | 220 | 4 |
| CJG-N1-05 | 195.58 | 183.75 | 0.94 | 0.0500 | 0.0020 | 0.2393 | 0.0098 | 0.0347 | 0.0004 | 196 | 93 | 218 | 8 | 220 | 3 |
| CJG-N1-31 | 203.97 | 174.27 | 0.85 | 0.0512 | 0.0024 | 0.2419 | 0.0102 | 0.0347 | 0.0005 | 251 | 107 | 220 | 8 | 220 | 3 |
| CJG-N1-04 | 194.81 | 160.42 | 0.82 | 0.0510 | 0.0021 | 0.2425 | 0.0096 | 0.0348 | 0.0005 | 240 | 97 | 220 | 8 | 220 | 3 |
| CJG-N1-34 | 164.58 | 118.40 | 0.72 | 0.0517 | 0.0026 | 0.2457 | 0.0118 | 0.0348 | 0.0006 | 271 | 115 | 223 | 10 | 220 | 4 |
| CJG-N1-43 | 249.91 | 296.94 | 1.19 | 0.0509 | 0.0019 | 0.2435 | 0.0089 | 0.0348 | 0.0005 | 238 | 87 | 221 | 7 | 221 | 3 |
| CJG-N1-44 | 241.19 | 269.88 | 1.12 | 0.0503 | 0.0017 | 0.2403 | 0.0080 | 0.0349 | 0.0005 | 207 | 80 | 219 | 7 | 221 | 3 |
| CJG-N1-03 | 166.94 | 109.95 | 0.66 | 0.0515 | 0.0025 | 0.2434 | 0.0108 | 0.0349 | 0.0005 | 264 | 109 | 221 | 9 | 221 | 3 |
| CJG-N1-18 | 197.55 | 123.01 | 0.62 | 0.0508 | 0.0022 | 0.2441 | 0.0107 | 0.0349 | 0.0005 | 232 | 102 | 222 | 9 | 221 | 3 |
| CJG-N1-08 | 189.20 | 106.69 | 0.56 | 0.0510 | 0.0030 | 0.2429 | 0.0135 | 0.0349 | 0.0006 | 240 | 134 | 221 | 11 | 221 | 4 |
| CJG-N1-19 | 215.75 | 159.64 | 0.74 | 0.0532 | 0.0039 | 0.2501 | 0.0167 | 0.0349 | 0.0008 | 337 | 167 | 227 | 14 | 221 | 5 |
| CJG-N1-32 | 195.55 | 166.48 | 0.85 | 0.0506 | 0.0018 | 0.2427 | 0.0085 | 0.0349 | 0.0004 | 224 | 83 | 221 | 7 | 221 | 3 |
| CJG-N1-12 | 308.13 | 188.86 | 0.61 | 0.0505 | 0.0021 | 0.2423 | 0.0096 | 0.0349 | 0.0005 | 218 | 96 | 220 | 8 | 221 | 3 |
| CJG-N1-50 | 195.23 | 133.33 | 0.68 | 0.0509 | 0.0023 | 0.2438 | 0.0109 | 0.0349 | 0.0006 | 238 | 104 | 222 | 9 | 221 | 3 |
| CJG-N1-24 | 242.28 | 295.32 | 1.22 | 0.0503 | 0.0020 | 0.2446 | 0.0099 | 0.0349 | 0.0005 | 211 | 90 | 222 | 8 | 221 | 3 |
| CJG-N1-40 | 234.26 | 128.45 | 0.55 | 0.0506 | 0.0019 | 0.2429 | 0.0088 | 0.0350 | 0.0004 | 222 | 89 | 221 | 7 | 221 | 3 |
| CJG-N1-21 | 157.43 | 111.73 | 0.71 | 0.0514 | 0.0022 | 0.2463 | 0.0105 | 0.0350 | 0.0005 | 258 | 98 | 224 | 9 | 222 | 3 |
| CJG-N1-14 | 119.17 | 83.34 | 0.70 | 0.0519 | 0.0030 | 0.2478 | 0.0143 | 0.0350 | 0.0008 | 282 | 130 | 225 | 12 | 222 | 5 |
| CJG-N1-09 | 288.72 | 231.74 | 0.80 | 0.0512 | 0.0021 | 0.2452 | 0.0096 | 0.0350 | 0.0006 | 250 | 93 | 223 | 8 | 222 | 3 |
| CJG-N1-28 | 293.75 | 226.30 | 0.77 | 0.0504 | 0.0020 | 0.2423 | 0.0093 | 0.0350 | 0.0006 | 215 | 91 | 220 | 8 | 222 | 4 |
| CJG-N1-47 | 124.34 | 97.50 | 0.78 | 0.0510 | 0.0028 | 0.2425 | 0.0123 | 0.0351 | 0.0006 | 241 | 125 | 220 | 10 | 222 | 4 |
| CJG-N1-23 | 291.68 | 333.45 | 1.14 | 0.0519 | 0.0023 | 0.2503 | 0.0106 | 0.0351 | 0.0005 | 283 | 102 | 227 | 9 | 222 | 3 |
| CJG-N1-10 | 412.53 | 302.46 | 0.73 | 0.0506 | 0.0015 | 0.2434 | 0.0069 | 0.0351 | 0.0005 | 221 | 68 | 221 | 6 | 222 | 3 |
| CJG-N1-17 | 162.45 | 144.24 | 0.89 | 0.0508 | 0.0022 | 0.2469 | 0.0110 | 0.0351 | 0.0004 | 234 | 100 | 224 | 9 | 223 | 3 |
| CJG-N1-42 | 258.04 | 184.54 | 0.72 | 0.0497 | 0.0023 | 0.2407 | 0.0103 | 0.0352 | 0.0006 | 181 | 107 | 219 | 8 | 223 | 4 |
| CJG-N1-13 | 158.71 | 115.00 | 0.72 | 0.0506 | 0.0036 | 0.2438 | 0.0182 | 0.0352 | 0.0011 | 224 | 164 | 222 | 15 | 223 | 7 |
| CJG-N1-35 | 185.71 | 159.24 | 0.86 | 0.0507 | 0.0022 | 0.2455 | 0.0108 | 0.0353 | 0.0005 | 228 | 102 | 223 | 9 | 223 | 3 |
| CJG-N1-27 | 288.51 | 223.84 | 0.78 | 0.0496 | 0.0022 | 0.2416 | 0.0105 | 0.0353 | 0.0005 | 177 | 103 | 220 | 9 | 224 | 3 |
| CJG-N1-46 | 229.38 | 130.84 | 0.57 | 0.0499 | 0.0033 | 0.2441 | 0.0147 | 0.0355 | 0.0009 | 190 | 152 | 222 | 12 | 225 | 5 |

Supplementary Table S2. Major and trace element concentrations of the migmatites in the southeastern Liaodong Peninsula.

| Unit name | Yabagou migmatite | | | | | Shendianzi migmatite | | | | | Lanqi migmatite | | | | Congjiagou migmatite | | | | |
| --- | --- | --- | --- | --- | --- | --- | --- | --- | --- | --- | --- | --- | --- | --- | --- | --- | --- | --- | --- |
| Sample | YBG-1 | YBG-2 | YBG-3 | YBG-4 | YBG-5 | SDZ-1 | SDZ-2 | SDZ-3 | SDZ-4 | SDZ-5 | LQ-Y1 | LQ-Y2 | LQ-Y3 | LQ-Y4 | CJG-Y1 | CJG-Y2 | CJG-Y3 | CJG-Y4 | CJG-Y5 |
| SiO2 | 66.02 | 66.14 | 66.30 | 65.91 | 66.15 | 62.27 | 63.69 | 69.59 | 67.30 | 64.16 | 61.42 | 62.54 | 62.73 | 61.19 | 61.86 | 63.14 | 61.65 | 62.98 | 62.52 |
| Al2O3 | 15.09 | 15.05 | 15.09 | 15.18 | 15.34 | 16.42 | 16.16 | 14.47 | 15.34 | 15.96 | 17.05 | 16.45 | 16.72 | 16.98 | 15.36 | 15.26 | 15.24 | 15.53 | 15.16 |
| TFe2O3 | 5.52 | 5.90 | 5.69 | 6.08 | 5.88 | 6.28 | 5.75 | 4.73 | 5.11 | 6.47 | 5.38 | 5.49 | 4.82 | 5.74 | 4.90 | 4.42 | 4.75 | 4.47 | 4.53 |
| MnO | 0.07 | 0.07 | 0.07 | 0.08 | 0.07 | 0.07 | 0.06 | 0.05 | 0.06 | 0.09 | 0.08 | 0.08 | 0.06 | 0.07 | 0.06 | 0.07 | 0.07 | 0.06 | 0.06 |
| MgO | 2.28 | 2.43 | 2.32 | 2.44 | 2.27 | 2.43 | 2.26 | 1.85 | 2.10 | 2.44 | 3.86 | 3.92 | 3.36 | 3.97 | 4.55 | 4.09 | 4.51 | 4.03 | 4.26 |
| CaO | 2.03 | 1.89 | 1.84 | 1.74 | 1.65 | 1.38 | 1.78 | 2.08 | 1.99 | 1.54 | 4.65 | 3.93 | 4.13 | 4.16 | 4.75 | 4.19 | 4.34 | 4.13 | 4.49 |
| Na2O | 2.39 | 2.27 | 2.23 | 2.06 | 2.13 | 2.76 | 3.21 | 3.49 | 3.30 | 2.40 | 3.20 | 2.28 | 3.15 | 3.16 | 3.03 | 2.93 | 2.94 | 3.20 | 2.90 |
| K2O | 2.89 | 3.32 | 3.28 | 3.32 | 3.53 | 4.55 | 3.42 | 2.11 | 2.95 | 3.66 | 2.34 | 2.81 | 2.43 | 2.71 | 3.25 | 3.56 | 3.70 | 3.34 | 3.65 |
| TiO2 | 0.73 | 0.80 | 0.77 | 0.80 | 0.76 | 0.87 | 0.80 | 0.64 | 0.72 | 0.92 | 0.73 | 0.69 | 0.69 | 0.86 | 0.78 | 0.64 | 0.71 | 0.61 | 0.66 |
| P2O5 | 0.14 | 0.14 | 0.13 | 0.13 | 0.14 | 0.14 | 0.15 | 0.15 | 0.16 | 0.16 | 0.31 | 0.26 | 0.25 | 0.31 | 0.27 | 0.25 | 0.27 | 0.28 | 0.26 |
| LOI | 2.15 | 2.39 | 2.17 | 2.29 | 2.28 | 2.01 | 2.03 | 1.40 | 1.12 | 2.10 | 0.81 | 1.26 | 1.03 | 0.97 | 0.93 | 0.90 | 2.33 | 0.66 | 0.83 |
| K2O/N2O | 1.21 | 1.46 | 1.47 | 1.61 | 1.66 | 1.65 | 1.07 | 0.60 | 0.89 | 1.53 | 0.73 | 1.23 | 0.77 | 0.86 | 1.07 | 1.22 | 1.26 | 1.05 | 1.26 |
| A/NK | 2.14 | 2.06 | 2.09 | 2.17 | 2.10 | 1.73 | 1.80 | 1.80 | 1.78 | 2.02 | 2.18 | 2.42 | 2.14 | 2.09 | 1.81 | 1.76 | 1.72 | 1.75 | 1.74 |
| A/CNK | 1.41 | 1.40 | 1.43 | 1.50 | 1.49 | 1.37 | 1.32 | 1.23 | 1.25 | 1.49 | 1.05 | 1.18 | 1.09 | 1.08 | 0.90 | 0.94 | 0.91 | 0.95 | 0.90 |
| La | 38.08 | 45.74 | 44.45 | 49.57 | 37.56 | 50.67 | 43.53 | 43.12 | 37.91 | 38.60 | 64.11 | 54.63 | 73.88 | 97.93 | 52.28 | 61.55 | 57.99 | 69.03 | 63.56 |
| Ce | 79.33 | 94.39 | 92.84 | 101.92 | 77.84 | 108.84 | 90.37 | 86.62 | 78.16 | 82.12 | 122.70 | 101.62 | 135.46 | 176.60 | 101.56 | 114.12 | 107.75 | 131.90 | 117.94 |
| Pr | 8.86 | 11.12 | 11.18 | 12.00 | 8.56 | 12.95 | 10.12 | 9.99 | 8.67 | 9.10 | 14.04 | 12.19 | 15.29 | 21.18 | 12.28 | 13.38 | 12.64 | 15.38 | 13.83 |
| Nd | 33.40 | 39.78 | 38.98 | 42.17 | 32.49 | 45.65 | 38.05 | 36.90 | 33.29 | 34.77 | 49.53 | 41.56 | 51.59 | 76.67 | 44.18 | 46.09 | 42.60 | 54.26 | 46.35 |
| Sm | 6.20 | 7.16 | 6.73 | 7.66 | 6.00 | 8.65 | 7.16 | 6.82 | 6.18 | 6.52 | 7.79 | 6.52 | 7.18 | 10.22 | 7.00 | 6.95 | 6.41 | 7.68 | 6.83 |
| Eu | 1.07 | 1.06 | 1.08 | 1.09 | 1.07 | 1.30 | 1.10 | 1.02 | 1.05 | 1.00 | 1.70 | 1.47 | 1.86 | 2.06 | 1.62 | 1.81 | 1.60 | 1.82 | 1.73 |
| Gd | 5.74 | 6.33 | 5.95 | 6.88 | 5.50 | 7.59 | 6.38 | 6.15 | 5.74 | 6.10 | 6.73 | 5.80 | 6.43 | 8.75 | 5.78 | 5.84 | 5.52 | 6.71 | 5.82 |
| Tb | 0.88 | 0.94 | 0.88 | 1.05 | 0.85 | 1.19 | 0.93 | 0.95 | 0.90 | 0.93 | 0.77 | 0.71 | 0.67 | 0.93 | 0.65 | 0.66 | 0.63 | 0.72 | 0.64 |
| Dy | 5.23 | 4.97 | 4.52 | 5.91 | 4.82 | 6.22 | 5.08 | 5.34 | 5.04 | 4.99 | 3.04 | 3.05 | 2.21 | 3.36 | 2.25 | 2.32 | 2.21 | 2.53 | 2.26 |
| Ho | 1.05 | 1.02 | 0.94 | 1.18 | 0.98 | 1.23 | 0.96 | 1.02 | 1.02 | 0.95 | 0.49 | 0.52 | 0.37 | 0.53 | 0.34 | 0.39 | 0.40 | 0.40 | 0.40 |
| Er | 3.04 | 2.82 | 2.69 | 3.38 | 2.79 | 3.60 | 2.60 | 2.74 | 2.79 | 2.64 | 1.21 | 1.27 | 1.00 | 1.39 | 0.91 | 1.04 | 1.04 | 1.07 | 1.06 |
| Tm | 0.45 | 0.40 | 0.38 | 0.47 | 0.40 | 0.49 | 0.33 | 0.37 | 0.38 | 0.36 | 0.15 | 0.17 | 0.12 | 0.16 | 0.11 | 0.13 | 0.14 | 0.13 | 0.13 |
| Yb | 3.10 | 2.53 | 2.55 | 3.22 | 2.71 | 3.35 | 1.96 | 2.14 | 2.35 | 2.22 | 0.81 | 1.00 | 0.65 | 0.87 | 0.61 | 0.70 | 0.73 | 0.71 | 0.75 |
| Lu | 0.45 | 0.39 | 0.38 | 0.45 | 0.40 | 0.49 | 0.30 | 0.33 | 0.35 | 0.36 | 0.13 | 0.15 | 0.10 | 0.14 | 0.09 | 0.11 | 0.11 | 0.11 | 0.11 |
| Y | 26.73 | 25.75 | 23.29 | 31.13 | 24.32 | 30.92 | 22.66 | 24.79 | 25.95 | 22.56 | 11.47 | 13.73 | 8.73 | 12.41 | 8.38 | 9.60 | 9.66 | 9.86 | 9.63 |
| ΣREE | 186.9 | 218.6 | 213.6 | 237.0 | 182.0 | 252.2 | 208.9 | 203.5 | 183.8 | 190.6 | 273.2 | 230.7 | 296.8 | 400.8 | 229.7 | 255.1 | 239.8 | 292.5 | 261.4 |
| LREE/HREE | 8.37 | 10.28 | 10.68 | 9.51 | 8.86 | 9.44 | 10.27 | 9.69 | 8.89 | 9.28 | 19.50 | 17.22 | 24.68 | 23.86 | 20.39 | 21.77 | 21.26 | 22.61 | 22.41 |
| (La/Yb)N | 8.81 | 12.99 | 12.50 | 11.06 | 9.95 | 10.85 | 15.94 | 14.45 | 11.55 | 12.47 | 56.75 | 39.26 | 81.21 | 80.76 | 61.33 | 62.97 | 56.63 | 69.33 | 61.17 |
| δEu | 0.54 | 0.47 | 0.51 | 0.45 | 0.56 | 0.48 | 0.49 | 0.47 | 0.53 | 0.48 | 0.70 | 0.72 | 0.82 | 0.65 | 0.76 | 0.84 | 0.80 | 0.76 | 0.82 |
| δCe | 1.02 | 0.99 | 0.99 | 0.99 | 1.02 | 1.02 | 1.02 | 0.99 | 1.02 | 1.04 | 0.96 | 0.93 | 0.94 | 0.91 | 0.95 | 0.93 | 0.93 | 0.95 | 0.93 |
| Nb | 13.85 | 14.58 | 14.11 | 14.44 | 13.91 | 15.99 | 14.87 | 12.50 | 14.13 | 15.99 | 8.15 | 8.57 | 8.23 | 10.43 | 5.91 | 6.16 | 5.43 | 5.97 | 5.27 |
| Ga | 20.78 | 20.15 | 20.85 | 20.24 | 20.87 | 23.49 | 22.45 | 18.84 | 21.08 | 24.18 | 24.26 | 22.53 | 24.10 | 28.68 | 23.14 | 23.41 | 21.04 | 22.26 | 21.51 |
| Zr | 254.93 | 225.12 | 206.46 | 211.74 | 218.05 | 253.30 | 274.97 | 186.56 | 207.92 | 241.85 | 203.58 | 199.56 | 201.57 | 228.81 | 134.33 | 117.77 | 147.69 | 215.34 | 231.36 |
| Th | 15.08 | 17.38 | 17.90 | 19.31 | 14.60 | 20.49 | 16.89 | 16.67 | 14.33 | 15.21 | 20.77 | 8.55 | 15.79 | 15.79 | 2.70 | 3.80 | 2.95 | 3.64 | 4.13 |
| Sr | 208.75 | 191.93 | 202.98 | 179.21 | 188.78 | 288.76 | 263.61 | 260.58 | 267.25 | 241.26 | 748.96 | 638.32 | 787.19 | 834.95 | 741.31 | 805.26 | 743.78 | 748.07 | 793.34 |
| Ba | 536.09 | 583.21 | 607.07 | 616.18 | 652.20 | 724.56 | 573.71 | 194.98 | 386.11 | 559.96 | 998.35 | 1048.15 | 1385.78 | 1168.18 | 1193.48 | 1661.86 | 1340.71 | 1458.27 | 1635.66 |
| V | 96.72 | 103.20 | 97.02 | 103.36 | 99.02 | 122.10 | 103.17 | 79.98 | 90.88 | 118.76 | 64.74 | 62.89 | 56.34 | 77.18 | 68.52 | 66.83 | 66.92 | 65.59 | 68.95 |
| Co | 9.92 | 11.08 | 11.79 | 11.11 | 10.75 | 14.21 | 12.31 | 10.85 | 11.80 | 14.30 | 14.72 | 14.00 | 13.31 | 18.00 | 17.00 | 17.39 | 17.89 | 16.38 | 17.58 |
| Cr | 59.99 | 51.92 | 50.48 | 56.75 | 55.77 | 50.85 | 52.20 | 40.40 | 46.74 | 46.27 | 88.66 | 76.85 | 68.51 | 64.50 | 114.68 | 97.88 | 107.54 | 99.91 | 93.37 |
| Ni | 35.07 | 35.21 | 42.34 | 36.42 | 39.32 | 37.38 | 39.19 | 48.03 | 50.31 | 41.22 | 47.62 | 38.30 | 38.56 | 45.93 | 97.48 | 84.28 | 132.34 | 74.99 | 88.26 |
| Rb | 151.14 | 160.32 | 160.18 | 158.40 | 168.08 | 242.33 | 206.36 | 146.21 | 191.59 | 212.16 | 127.67 | 151.01 | 126.70 | 158.59 | 108.28 | 118.70 | 111.60 | 123.04 | 115.78 |
| Ta | 0.92 | 0.92 | 0.92 | 0.91 | 0.92 | 1.12 | 1.10 | 0.97 | 1.10 | 1.11 | 0.24 | 0.32 | 0.27 | 0.30 | 0.17 | 0.29 | 0.18 | 0.24 | 0.18 |
| U | 1.78 | 1.79 | 1.82 | 2.06 | 1.72 | 3.01 | 2.57 | 2.23 | 2.23 | 2.20 | 1.08 | 0.59 | 0.98 | 0.92 | 0.16 | 0.26 | 0.19 | 0.35 | 0.26 |
| Hf | 6.95 | 5.98 | 5.51 | 5.68 | 5.79 | 7.12 | 7.58 | 4.99 | 5.66 | 6.77 | 5.30 | 5.07 | 5.31 | 5.85 | 3.32 | 3.04 | 3.71 | 5.53 | 5.94 |
| Cs | 5.47 | 5.59 | 4.94 | 5.67 | 5.60 | 8.32 | 7.78 | 5.56 | 6.35 | 8.62 | 6.17 | 9.92 | 6.29 | 6.55 | 1.92 | 1.85 | 1.90 | 3.36 | 1.75 |
| Sc | 13.98 | 13.76 | 13.55 | 14.50 | 14.28 | 15.87 | 13.45 | 10.38 | 12.08 | 15.48 | 14.90 | 13.88 | 11.70 | 14.68 | 13.63 | 12.52 | 10.78 | 11.37 | 11.18 |

Major elements are reported in wt.%, trace and REE concentrations are reported in ppm. (La/Yb)N = (La/0.237)/(Yb/0.17). EuN/EuN* = 2*(Eu/0.058)/((Sm/0.153) + (Gd/0.206)); CeN/CeN* = 2*(Ce/0.612)/((La/0.237) + (Pr/0.095)).
